# Supplementary material for: A set of monomeric near-infrared fluorescent proteins for multicolor imaging across scales
Source: PubMed Central journal article supplement (PMC6957686; doi:10.1038/s41467-019-13897-6), 2020-01-13
Supplement: 41467_2019_13897_MOESM1_ESM.pdf [file 41467_2019_13897_MOESM1_ESM.pdf]

# **A set of monomeric near-infrared fluorescent proteins for multicolor imaging across scales**

Mikhail E. Matlashov, Daria M. Shcherbakova, Jonatan Alvelid, Mikhail Baloban, Francesca Pennacchietti, Anton A. Shemetov, Ilaria Testa and Vladislav V. Verkhusha

Supplementary Information

**Supplementary Table 1. Signal-to-noise ratio (SNR) and signal-to-background ratio (SBR) for emiRFP703 and SiR-tubulin.** SNR and SBR were both calculated on the whole image. SNR was calculated as the average signal divided by the standard deviation of the background, without or with the mean background subtracted from the image. SBR was calculated as the average signal divided by the average background.

| <b>NIR FP or dye</b> | <b>Structure</b> | <b>SNR (<math>\mu_s/\sigma_b</math>)</b> | <b>SNR (background subtracted) (<math>\mu_s/\sigma_b</math>)</b> | <b>SBR (<math>\mu_s/\mu_b</math>)</b> | <b>STED power, mW</b> | <b>STED intensity, MW/cm<sup>2</sup></b> | <b>Pixel size, nm</b> | <b>Pixel dwell time, <math>\mu</math>s</b> | <b>STED dose, kJ/cm<sup>2</sup></b> |
|----------------------|------------------|------------------------------------------|------------------------------------------------------------------|---------------------------------------|-----------------------|------------------------------------------|-----------------------|--------------------------------------------|-------------------------------------|
| emiRFP703            | tubulin          | 5 $\pm$ 0.3                              | 3.3 $\pm$ 0.2                                                    | 1.7 $\pm$ 0                           | 14-17                 | 5.8-7.1                                  | 30                    | 30                                         | 49-59                               |
| emiRFP670            | tubulin          | 3.9 $\pm$ 0.3                            | 3.0 $\pm$ 0.3                                                    | 2.0 $\pm$ 0.1                         | 17-25                 | 7.2-10.2                                 | 30                    | 30                                         | 61-86                               |
| emiRFP703            | vimentin         | 5.5 $\pm$ 0.4                            | 6.2 $\pm$ 0.4                                                    | 4.5 $\pm$ 1.1                         | 12                    | 5.0                                      | 30                    | 5                                          | 6.7                                 |
| SiR                  | tubulin          | 5 $\pm$ 0.3                              | 5.3 $\pm$ 0.4                                                    | 4.7 $\pm$ 0.6                         | 30                    | 12.5                                     | 30                    | 30                                         | 105                                 |

**Supplementary Table 2. Photostability in STED imaging of emiRFP703 compared to that of the published NIR and far-red FPs.**

The STED dose is the total energy per area unit delivered to the sample by the STED beam during the acquisition of an image.

| NIR FP      | Structure | Photostability in mammalian cells, $f_{1/2}$ , frames | Photostability in mammalian cells, $f_{1/e}$ , frames | STED wavelength, nm | STED power, mW | Pixel size, nm | Pixel dwell time, $\mu$ s | STED dose, kJ/cm <sup>2</sup> | Reference    |
|-------------|-----------|-------------------------------------------------------|-------------------------------------------------------|---------------------|----------------|----------------|---------------------------|-------------------------------|--------------|
| emiRFP703   | vimentin  | 21                                                    | 33                                                    | 775                 | 12             | 30             | 5                         | 6.7                           | this paper   |
| SNIFP       | vimentin  | 8 (from graph)                                        | 11 $\pm$ 3                                            | 860                 | 220            | 30             | 10                        | 244                           | <sup>1</sup> |
| mGarnet2    | vimentin  | 6 (f.g.)                                              | 8 $\pm$ 2                                             | 775                 | 53             | 30             | 30                        | 177                           | <sup>1</sup> |
| mGarnet     | LifeAct   | 14 (f.g.)                                             | 19 (f.g.)                                             | 780                 | 29             | 40             | 40                        | 73                            | <sup>2</sup> |
| mGarnet     | RITA      | 35 (f.g)                                              | ~55 (f.g.)                                            | 780                 | 46             | 40             | 40                        | 115                           | <sup>2</sup> |
| mGarnet2    | RITA      | ~12 (f.g.)                                            | ~15 (f.g.)                                            | 780                 | 36             | 40             | 40                        | 90                            | <sup>3</sup> |
| mGarnet     | RITA      | ~13 (f.g.)                                            | ~19 (f.g.)                                            | 780                 | 36             | 40             | 40                        | 90                            | <sup>3</sup> |
| mKate2      | LifeAct   | <2                                                    | -                                                     | 732                 | 20             | -              | -                         | -                             | <sup>4</sup> |
| mPlum       | LifeAct   | >2                                                    | -                                                     | 732                 | 20             | -              | -                         | -                             | <sup>4</sup> |
| TagRFP657   | LifeAct   | >2                                                    | -                                                     | 732                 | 20             | -              | -                         | -                             | <sup>4</sup> |
| mNeptune    | LifeAct   | <8                                                    | -                                                     | 732                 | 47.5           | -              | -                         | -                             | <sup>4</sup> |
| mNeptune2   | LifeAct   | <8                                                    | -                                                     | 732                 | 47.5           | -              | -                         | -                             | <sup>4</sup> |
| mNeptune2.5 | LifeAct   | <8                                                    | <8                                                    | 732                 | 47.5           | -              | -                         | -                             | <sup>4</sup> |
| mCardinal   | LifeAct   | >8                                                    | -                                                     | 732                 | 47.5           | -              | -                         | -                             | <sup>4</sup> |
| mRuby       | LifeAct   | <7                                                    | <7                                                    | 732                 | 9.5            | -              | -                         | -                             | <sup>4</sup> |
| mRuby2      | LifeAct   | <7                                                    | <7                                                    | 732                 | 9.5            | -              | -                         | -                             | <sup>4</sup> |

**Supplementary Table 3. List of primers used in this study.**

| Purpose                                                  | Primer  | Sequence (5'-3')                                                     |
|----------------------------------------------------------|---------|----------------------------------------------------------------------|
| Monomerization of RpBphP2-derived iRFPs                  | Forward | GGCCGCCAAGCCTGCAAGAGGGTCGCCGAGAGG<br>CTGGCCACTCAGATCGGGCGTGATGGAAGAG |
|                                                          | Reverse | CTCTTCCATCACGCCGATCTGAGTGGCCAGCCTC<br>TCGGCGACCCTCTTGCAGGCTTGGCGGCC  |
| Monomerization of RpBphP6-derived iRFPs                  | Forward | CAGCGCGTCGCGGCCAAGAGGTTGCCGAGAGG<br>TTATCGACTCACTTCACCGCCGCCAC       |
|                                                          | Reverse | GTGGGCGGGCGGTGAAGTGAGTCGATAACCTCTCG<br>GCGAACCTCTTGGCCGCGACGCGCTG    |
| Removing 12 aa from N-terminus of RpBphP1-derived miRFPs | Forward | CCACCGGTCGCCACCATGACCGCCTCTCATTCGA<br>ATTGCG                         |
|                                                          | Reverse | CGCAATTCGAATGAGAGGCGGTCATGGTGGCGA<br>CCGGTGG                         |
| Removing 13 aa from N-terminus of RpBphP1-derived miRFPs | Forward | CCACCGGTCGCCACCATGGCCTCTCATTCGAATT<br>GCGAACATG                      |
|                                                          | Reverse | CATGTTTCGCAATTCGAATGAGAGGCCATGGTGGC<br>GACCGGTGG                     |
| Removing 14 aa from N-terminus of RpBphP1-derived miRFPs | Forward | GATCCACCGGTCGCCACCATGTCTCATTCGAATT<br>GCGAACATGAAGAG                 |
|                                                          | Reverse | CTCTTCATGTTTCGCAATTCGAATGAGACATGGTG<br>GCGACCGGTGGATC                |
| Removing 15 aa from N-terminus of RpBphP1-derived miRFPs | Forward | CCACCGGTCGCCACCATGCATTCGAATTGCGAAC<br>ATGAAGAGATC                    |

---

|                                                                 |         |                                                                                                |
|-----------------------------------------------------------------|---------|------------------------------------------------------------------------------------------------|
|                                                                 | Reverse | GATCTCTTCATGTTTCGCAATTCGAATGCATGGTG<br>GCGACCGGTGG                                             |
| Removing 16 aa from<br>N-terminus of RpBphP1-<br>derived miRFPs | Forward | CCACCGGTCGCCACCATGTTCGAATTGCGAACATG<br>AAGAGATCC                                               |
|                                                                 | Reverse | GGATCTCTTCATGTTTCGCAATTCGACATGGTGGC<br>GACCGGTGG                                               |
| Designing emiRFPs and<br>C-terminal fusions of<br>emiRFPs       | Forward | GAACCGTCAGATCCGCTAGCCACCATGGCGGAA<br>GGATCCGTCGCCAGGCAGCCTGACCTCTTGACCT<br>GCGAACATGAAGAGATCC  |
|                                                                 | Reverse | GGATCTCTTCATGTTTCGCAGGTCAAGAGGTCAGG<br>CTGCCTGGCGACGGATCCTTCCGCCATGGTGGCT<br>AGCGGATCTGACGGTTC |
| Designing N-terminal<br>fusions of emiRFPs                      | Forward | ATCCACCGGTCGCCACCGCGGCCTCTCATTCGAA<br>TTGCG                                                    |
|                                                                 | Reverse | GAGTGCGGCCGCTTAGCTCTCAAGCGCGGTG                                                                |

---

|                |   |                                                                    |    |
|----------------|---|--------------------------------------------------------------------|----|
| <b>BrBphP</b>  | 1 | --MPVPLTTPAFGHATLANCEREQIHLAGSIQPHGILLAVKEPDNVVIQASINAAEFLNT       | 58 |
| mIFP           | 1 | --MSVPLTTSFAFGHAFLANCEREQIHLAGSIQPHGILLAVKEPDNVVIQASINAAEFLNT      | 58 |
| <b>RpBphP1</b> | 1 | MVAGHASGSPAFGTADLSNCEREIEIHLAGSIQPHGALLVSEPDHRIIQASANAAEFLNL       | 60 |
| miRFP670       | 1 | MVAGHASGSPAFGTASHSNCEHEEIEIHLAGSIQPHGALLVSEHDHRVIQASANAAEFLNL      | 60 |
| emiRFP670      | 1 | -----MAEGSVARQPDLLTCEHEEIEIHLAGSIQPHGALLVSEHDHRVIQASANAAEFLNL      | 55 |
| miRFP703       | 1 | MVAGHASGSPAFGTASHSNCEHEEIEIHLAGSIQPHGALLVSEHDHRVIQASANAAEFLNL      | 60 |
| emiRFP703      | 1 | -----MAEGSVARQPDLLTCEHEEIEIHLAGSIQPHGALLVSEHDHRVIQASANAAEFLNL      | 55 |
| <b>RpBphP2</b> | 1 | -----MTEGSVARQPDLLTCDDEPIHIPGAIQPHGLLLALAADM TIV-AGSDNLP E L T G L | 54 |
| iRFP713/V256C  | 1 | -----MAEGSVARQPDLLTCDDEPIHIPGAIQPHGLLLALAADM TIV-AGSDNLP E L T G L | 54 |
| miRFP680       | 1 | -----MAEGSVARQPDLLTCDDEPIHIPGAIQPHGLLLALAADM TIV-AGSDNLP E L T G L | 54 |
| iRFP682        | 1 | -----MAEGSVARQPDLLTCDDEPIHIPGAIQPHGLLLALAADM TIV-AGSDNLP E L T G L | 54 |
| iRFP713        | 1 | -----MAEGSVARQPDLLTCDDEPIHIPGAIQPHGLLLALAADM TIV-AGSDNLP E L T G L | 54 |
| miRFP713       | 1 | -----MAEGSVARQPDLLTCDDEPIHIPGAIQPHGLLLALAADM TIV-AGSDNLP E L T G L | 54 |
| iRFP720        | 1 | -----MAEGSVARQPDLLTCDDEPIHIPGAIQPHGLLLALAADM TIV-AGSDNLP E L T G L | 54 |
| miRFP720       | 1 | -----MAEGSVARQPDLLTCDDEPIHIPGAIQPHGLLLALAADM TIV-AGSDNLP E L T G L | 54 |
| <b>RpBphP6</b> | 1 | -----MPRKVDLTSCDREPIHIPGSIQPCGCLLACDAQAVRITRITENAGAFFGR            | 50 |
| iRFP670        | 1 | -----MARKVDLTSCDREPIHIPGSIQPCGCLLACDAQAVRITRITENAGAFFGR            | 50 |
| miRFP670-2     | 1 | -----MARKVDLTSCDREPIHIPGSIQPCGCLLACDAQAVRITRITENAGAFFGR            | 50 |
| iRFP702        | 1 | -----MARKVDLTSCDREPIHIPGSIQPCGCLLACDAQAVRITRITENAGAFFGR            | 50 |
| miRFP702       | 1 | -----MARKVDLTSCDREPIHIPGSIQPCGCLLACDAQAVRITRITENAGAFFGR            | 50 |

**PAS**

|                |    |                                                               |     |
|----------------|----|---------------------------------------------------------------|-----|
| <b>BrBphP</b>  | 59 | --NSVVGRLPLRDLGGDLA---LQILPHLNGPLHLAPMTLRCTVGSPPRRVDCTVHRPSNG | 113 |
| mIFP           | 59 | --NSVVGRLPLRDLGGDLP---LQILPHLNGPLHLAPMTLRCTVGSPPRRVDCTIHRPSNG | 113 |
| <b>RpBphP1</b> | 61 | --GSVLGVPLAEIDGDLL---IKILPHLDPTAEGMPVAVRCRIGNPSTEYDGLMHRPPEG  | 115 |
| miRFP670       | 61 | --GSVLGVPLAEIDGDLL---IKILPHLDPTAEGMPVAVRCRIGNPSTEYCGLMHRPPEG  | 115 |
| emiRFP670      | 56 | --GSVLGVPLAEIDGDLL---IKILPHLDPTAEGMPVAVRCRIGNPSTEYCGLMHRPPEG  | 110 |
| miRFP703       | 61 | --GSVLGVPLAEIDGDLL---IKILPHLDPTAEGMPVAVRCRIGNPSTEYCGLMHRPPEG  | 115 |
| emiRFP703      | 56 | --GSVLGVPLAEIDGDLL---IKILPHLDPTAEGMPVAVRCRIGNPSTEYCGLMHRPPEG  | 110 |
| <b>RpBphP2</b> | 55 | AIGALIGRSAADVFDSETHNRLTIALAEPGAAVGAPIVGF TMR-KDAGFVGSWHRH-DQ  | 112 |
| iRFP713/V256C  | 55 | AIGALIGRSAADVFDSETHNRLTIALAEPGAAVGAPIVGF TMR-KDAGFVGSWHRH-DQ  | 112 |
| miRFP680       | 55 | AIGALIGRSAADVFDSETHNRLTIALAEPGAAVGAPIVGF TMR-KDAGFVGSWHRH-DQ  | 112 |
| iRFP682        | 55 | AIGALIGRSAADVFDSETHNRLTIALAEPGAAVGAPIVGF TMR-KDAGFVGSWHRH-DQ  | 112 |
| iRFP713        | 55 | AIGALIGRSAADVFDSETHNRLTIALAEPGAAVGAPIVGF TMR-KDAGFVGSWHRH-DQ  | 112 |
| miRFP713       | 55 | AIGALIGRSAADVFDSETHNRLTIALAEPGAAVGAPIVGF TMR-KDAGFVGSWHRH-DQ  | 112 |
| iRFP720        | 55 | AIGALIGRSAADVFDSETHNRLTIALAEPGAAVGAPIVGF TMR-KDAGFVGSWHRH-DQ  | 112 |
| miRFP720       | 55 | AIGALIGRSAADVFDSETHNRLTIALAEPGAAVGAPIVGF TMR-KDAGFVGSWHRH-DQ  | 112 |
| <b>RpBphP6</b> | 51 | ET-PRVGELLADYFGETEHAHALRNALAQSSDPKRPALIFGWRDGLTGRTFDISLHRH-DG | 108 |
| iRFP670        | 51 | ET-PRVGELLADYFGETEHAHALRNALAQSSDPKRPALIFGWRDGLTGRTFDISLHRH-DG | 108 |
| miRFP670-2     | 51 | ET-PRVGELLADYFGETEHAHALRNALAQSSDPKRPALIFGWRDGLTGRTFDISLHRH-DG | 108 |
| iRFP702        | 51 | ET-PRVGELLADYFGETEHAHALRNALAQSSDPKRPALIFGWRDGLTGRTFDISLHRH-DG | 108 |
| miRFP702       | 51 | ET-PRVGELLADYFGETEHAHALRNALAQSSDPKRPALIFGWRDGLTGRTFDISLHRH-DG | 108 |

**PAS**

|                |     |                                                                |     |
|----------------|-----|----------------------------------------------------------------|-----|
| <b>BrBphP</b>  | 114 | GLIVELEPATKTTNVAPA---LDGAFHRITSSSSLI GLCDE TATI FREITGYDRVMVYR | 169 |
| mIFP           | 114 | GLIVELEPATKTTNIAPA---LDGAFHRITSSSSLMGLCDE TATI IREITGYDRVMVVR  | 169 |
| <b>RpBphP1</b> | 116 | GLIIELERAGPPIDLSGT---LAPALERIRTAGSLRALCDDTALLFQQCTGYDRVMVYR    | 171 |
| miRFP670       | 116 | GLIIELERAGPSIDLSGT---LAPALERIRTAGSLRALCDDTVLLFQQCTGYDRVMVYR    | 171 |
| emiRFP670      | 111 | GLIIELERAGPSIDLSGT---LAPALERIRTAGSLRALCDDTVLLFQQCTGYDRVMVYR    | 166 |
| miRFP703       | 116 | GLIIELERAGPSIDLSGT---LAPALERIRTAGSLRALCDDTVLLFQQCTGYDRVMVYR    | 171 |
| emiRFP703      | 111 | GLIIELERAGPSIDLSGT---LAPALERIRTAGSLRALCDDTVLLFQQCTGYDRVMVYR    | 166 |

|                |     |                                                              |     |
|----------------|-----|--------------------------------------------------------------|-----|
| <b>RpBphP2</b> | 113 | LVFLELEPPQRDVAEPQAFFRRSNSAIRRLQAAETLESACAAAAQEVREITGFDRVMIYR | 172 |
| iRFP713/V256C  | 113 | LIFLELEPPQRDVAEPQAFFRRSNSAIRRLQAAETLESACAAAAQEVKRITGFDRVMIYR | 172 |
| miRFP680       | 113 | LIFLELEPPQRDVAEPQAFFRRSNSAIRRLQAAETLESACAAAAQEVKRITGFDRVMIYR | 172 |
| iRFP682        | 113 | LIFLELEPPQRDVAEPQAFFRRSNSAIRRLQAAETLESACAAAAQEVKRITGFDRVMIYR | 172 |
| iRFP713        | 113 | LIFLELEPPQRDVAEPQAFFRRSNSAIRRLQAAETLESACAAAAQEVKRITGFDRVMIYR | 172 |
| miRFP713       | 113 | LIFLELEPPQRDVAEPQAFFRRSNSAIRRLQAAETLESACAAAAQEVKRITGFDRVMIYR | 172 |
| iRFP720        | 113 | LIFLELEPPQRDVAEPQAFFRRSNSAIRRLQAAETLESACAAAAQEVKRITGFDRVMIYR | 172 |
| miRFP720       | 113 | LIFLELEPPQRDVAEPQAFFRRSNSAIRRLQAAETLESACAAAAQEVKRITGFDRVMIYR | 172 |

|                |     |                                                               |     |
|----------------|-----|---------------------------------------------------------------|-----|
| <b>RpBphP6</b> | 109 | TSIVFEPAAADQADNPL--RLTRQIIARTKELKSLEEMAARVPRYLQAMLGYHRVMMYR   | 166 |
| iRFP670        | 109 | TSIIIEFEPAAAEQADNPL--RLTRQIIARTKELKSLEEMAARVPRYLQAMLGYHRVMLYR | 166 |
| miRFP670-2     | 109 | TSIIIEFEPAAAEQADNPL--RLTRQIIARTKELKSLEEMAARVPRYLQAMLGYHRVMLYR | 166 |
| iRFP702        | 109 | TSIVFEPAAAEQADNPL--RLTRQIIARTKELKSLEEMAARVPRYLQAMLGYHRVMLYR   | 166 |
| miRFP702       | 109 | TSIIIEFEPAAAEQADNPL--RLTRQIIARTKELKSLEEMAARVPRYLQAMLGYHRVMLYR | 166 |

PAS

GAF

|               |     |                                                                |     |
|---------------|-----|----------------------------------------------------------------|-----|
| <b>BrBphP</b> | 170 | FDEEGHGEVLSERRRPDLEAF LGNRYPASDI PQIARRLYERNRVRLLDVNYTPVPLQPR  | 229 |
| mIFP          | 170 | FDEEGNGEILSERRRADLEAF LGNRYPASTI PQIARRLYEHN RVRLLDVNYTPVPLQPR | 229 |

|                |     |                                                               |     |
|----------------|-----|---------------------------------------------------------------|-----|
| <b>RpBphP1</b> | 172 | FDEQGHGEVFSERHVPGLSEYFGNRYPSSDI PQMARRLYERQVRVRLVDVSYQPVPLEPR | 231 |
| miRFP670       | 172 | FDEQGHGLVFSECHVPGLSEYFGNRYPSSSTVPQMARQLYVRQVRVRLVDVTYQPVPLEPR | 231 |
| emiRFP670      | 167 | FDEQGHGLVFSECHVPGLSEYFGNRYPSSSTVPQMARQLYVRQVRVRLVDVTYQPVPLEPR | 226 |
| miRFP703       | 172 | FDEQGHGLVFSECHVPGLSEYFGNRYPSSLVPMARQLYVRQVRVRLVDVTYQPVPLEPR   | 231 |
| emiRFP703      | 167 | FDEQGHGLVFSECHVPGLSEYFGNRYPSSLVPMARQLYVRQVRVRLVDVTYQPVPLEPR   | 226 |

|                |     |                                                                |     |
|----------------|-----|----------------------------------------------------------------|-----|
| <b>RpBphP2</b> | 173 | FASDFSGEVIAEDRCAEVESYLGLHFPASDI PAQARRLYTINPVRI IPDINYPVPVTPD  | 232 |
| iRFP713/V256C  | 173 | FASDFSGEVIAEDRCAEVESKLG LHPASTVPAQARRLYTINPVRI IPDINYPVPVTPD   | 232 |
| miRFP680       | 173 | FASDFSGEVIAEDRCAEVESKLG LHPASTVPAQARRLYTINPVRI IPDINYPVPVTPD   | 232 |
| iRFP682        | 173 | FASDFSGVVIAEDRCAEVESKLG LHPASAVPAQARRLYTINPVRI IPDINYPVPVTPD   | 232 |
| iRFP713        | 173 | FASDFSGEVIAEDRCAEVESKLG LHPASTVPAQARRLYTINPVRI IPDINYPVPVTPD   | 232 |
| miRFP713       | 173 | FASDFSGEVIAEDRCAEVESKLG LHPASTVPAQARRLYTINPVRI IPDINYPVPVTPD   | 232 |
| iRFP720        | 173 | FASDFS SVVIAEDRCAEVESKLG LHPASFI PAQARRLYTINPVRI IPDINYPVPVTPD | 232 |
| miRFP720       | 173 | FASDFS SVVIAEDRCAEVESKLG LHPASFI PAQARRLYTINPVRI IPDINYPVPVTPD | 232 |

|                |     |                                                               |     |
|----------------|-----|---------------------------------------------------------------|-----|
| <b>RpBphP6</b> | 167 | FADDGSGKVI GEAKRSDLESFLGQHFPASDI PQQARLLYLKNAIRVSDSRGISSRIVPE | 226 |
| iRFP670        | 167 | FADDGSGMVI GEAKRSDLESFLGQHFPASLV PQQARLLYLKNAIRVSDSRGISSRIVPE | 226 |
| miRFP670-2     | 167 | FADDGSGMVI GEAKRSDLESFLGQHFPASLV PQQARLLYLKNAIRVSDSRGISSRIVPE | 226 |
| iRFP702        | 167 | FADDGSGKVI GEAKRSDLESFLGQHFPASLV PQQARLLYLKNAIRVSDSRGISSRIVPE | 226 |
| miRFP702       | 167 | FADDGSGMVI GEAKRSDLESFLGQHFPASLV PQQARLLYLKNAIRVSDSRGISSRIVPE | 226 |

GAF

|               |     |                                                               |     |
|---------------|-----|---------------------------------------------------------------|-----|
| <b>BrBphP</b> | 230 | ISPLNGRDL DMSLSCLRSMSP IHQKYLQNMVGATLVCSLMVSGRLWGLIACHHYEPRFV | 289 |
| mIFP          | 230 | ISPLNGRDL DMSLSCLRSMSP IHQKYMQDMVGATLVCSLMVSGRLWGLIACHHYEPRFV | 289 |

|                |     |                                                                  |     |
|----------------|-----|------------------------------------------------------------------|-----|
| <b>RpBphP1</b> | 232 | LSPLTGRDL DMSGCF LRSMSPIHLQYLK NMGVRATLVVSLVVGK L WGLVACHHYLPRFI | 291 |
| miRFP670       | 232 | LSPLTGRDL DMSGCF LRSMSPIHLQFLKDMGVRATLAVSLVVGK L WGLVCHHYLPRFI   | 291 |
| emiRFP670      | 227 | LSPLTGRDL DMSGCF LRSMSPIHLQFLKDMGVRATLAVSLVVGK L WGLVCHHYLPRFI   | 286 |
| miRFP703       | 232 | LSPLTGRDL DMSGCF LRSMSPIHLQFLKDMGVRATLAVSLVVGK L WGLVCHHYLPRFI   | 291 |
| emiRFP703      | 227 | LSPLTGRDL DMSGCF LRSMSPIHLQFLKDMGVRATLAVSLVVGK L WGLVCHHYLPRFI   | 286 |

|                |     |                                                             |     |
|----------------|-----|-------------------------------------------------------------|-----|
| <b>RpBphP2</b> | 233 | LNPVTGRPIDLSFAILRSVSPVHLEFMRNIGMGTMSISILRGERLWGLIACHHRKPNYV | 292 |
| iRFP713/V256C  | 233 | LNPVTGRPIDLSFAILRSVSPCHLEFMRNIGMGTMSISILRGERLWGLIVCHHRTPIYV | 292 |
| miRFP680       | 233 | LNPVTGRPIDLSFAILRSVSPCHLEFMRNIGMGTMSISILRGERLWGLIVCHHRTPIYV | 292 |
| iRFP682        | 233 | LNPVTGRPIDLSFAILRSVSPCHLEFMRNIGMGTMSISILRGERLWGLIVCHHRTPIYV | 292 |
| iRFP713        | 233 | LNPVTGRPIDLSFAILRSVSPVHLEFMRNIGMGTMSISILRGERLWGLIVCHHRTPIYV | 292 |
| miRFP713       | 233 | LNPVTGRPIDLSFAILRSVSPVHLEFMRNIGMGTMSISILRGERLWGLIVCHHRTPIYV | 292 |
| iRFP720        | 233 | LNPVTGRPIDLSFAILRSVSPNHLEFMRNIGMGTMSISILRGERLWGLIVCHHRTPIYV | 292 |
| miRFP720       | 233 | LNPVTGRPIDLSFAILRSVSPNHLEFMRNIGMGTMSISILRGERLWGLIVCHHRTPIYV | 292 |

|                |     |                       |                      |                     |     |
|----------------|-----|-----------------------|----------------------|---------------------|-----|
| <b>RpBphP6</b> | 227 | RDAS-GAALDLSFAHLRSVSP | CHLEFLRNMGVSASMSLSII | IDGTLWGLIACHHYEPRAV | 285 |
| iRFP670        | 227 | HDAS-GAALDLSFAHLRSISP | CHLEFLRNMGVSASMSLSII | IDGTLWGLIICHHYEPRAV | 285 |
| miRFP670-2     | 227 | HDAS-GAALDLSFAHLRSISP | CHLEFLRNMGVSASMSLSII | IDGTLWGLIICHHYEPRAV | 285 |
| iRFP702        | 227 | HDAS-GAALDLSFAHLRSISP | CHLEFLRNMGVSASMSLSII | IDGTLWGLIICHHYEPRAV | 285 |
| miRFP702       | 227 | HDAS-GAALDLSFAHLRSISP | CHLEFLRNMGVSASMSLSII | IDGTLWGLIICHHYEPRAV | 285 |
| <hr/>          |     |                       |                      |                     |     |
| <b>GAF</b>     |     |                       |                      |                     |     |
| <br>           |     |                       |                      |                     |     |
| <b>BrBphP</b>  | 290 | PFDIRAAGEALAETCAIRIAA | LESFAQSQSE           | 320                 |     |
| mIFP           | 290 | PFHIRAAGEALAETCAIRIAT | LESFAQSQSK           | 320                 |     |
| <br>           |     |                       |                      |                     |     |
| <b>RpBphP1</b> | 292 | HFELRAICELLAEAIATRITA | LES-----             | 315                 |     |
| miRFP670       | 292 | RFELRAICKRLAER        | IATRITALES-----      | 315                 |     |
| emiRFP670      | 287 | RFELRAICKRLAER        | IATRITALES-----      | 310                 |     |
| miRFP703       | 292 | RFELRAICKRLAER        | IATRITALES-----      | 315                 |     |
| emiRFP703      | 287 | RFELRAICKRLAER        | IATRITALES-----      | 310                 |     |
| <br>           |     |                       |                      |                     |     |
| <b>RpBphP2</b> | 293 | DL DGRQACELVAQVLAWQIG | VME-----             | 316                 |     |
| iRFP713/V256C  | 293 | DL DGRQACELVAQVLAWQIG | VME-----             | 316                 |     |
| miRFP680       | 293 | DL DGRQAC             | KRVAERLATQIGVME----- | 316                 |     |
| iRFP682        | 293 | DL DGRQACELVAQVLAWQIG | VME-----             | 316                 |     |
| iRFP713        | 293 | DL DGRQACELVAQVLAWQIG | VME-----             | 316                 |     |
| miRFP713       | 293 | DL DGRQAC             | KRVAERLATQIGVME----- | 316                 |     |
| iRFP720        | 293 | DL DGRQACELVAQVLAWQIG | VME-----             | 316                 |     |
| miRFP720       | 293 | DL DGRQAC             | KRVAERLATQIGVME----- | 316                 |     |
| <br>           |     |                       |                      |                     |     |
| <b>RpBphP6</b> | 286 | PMAQRVAAEMFADFFSLHFTA | AHHQR-----           | 311                 |     |
| iRFP670        | 286 | PMAQRVAAEMFADFLSLHFTA | AHHQR-----           | 311                 |     |
| miRFP670-2     | 286 | PMAQRVAA              | KRFAERLS             | THFTAHHQR-----      | 311 |
| iRFP702        | 286 | PMAQRVAAEMFADFLSLHFTA | AHHQR-----           | 311                 |     |
| miRFP702       | 286 | PMAQRVAA              | KRFAERLS             | THFTAHHQR-----      | 311 |
| <hr/>          |     |                       |                      |                     |     |
| <b>GAF</b>     |     |                       |                      |                     |     |

**Supplementary Figure 1. Alignment of the amino acid sequences of reported NIR FPs with parental BrBphP, RpBphP1, RpBphP2 and RpBphP6 bacterial phytochromes.** The residues substituted in the monomerized proteins based on alignment with RpBphP1-derived miRFPs are in yellow, the residues substituted in emiRFPs based on alignment with RpBphP2-derived miRFPs are marked green. BV-binding Cys residues are marked green.



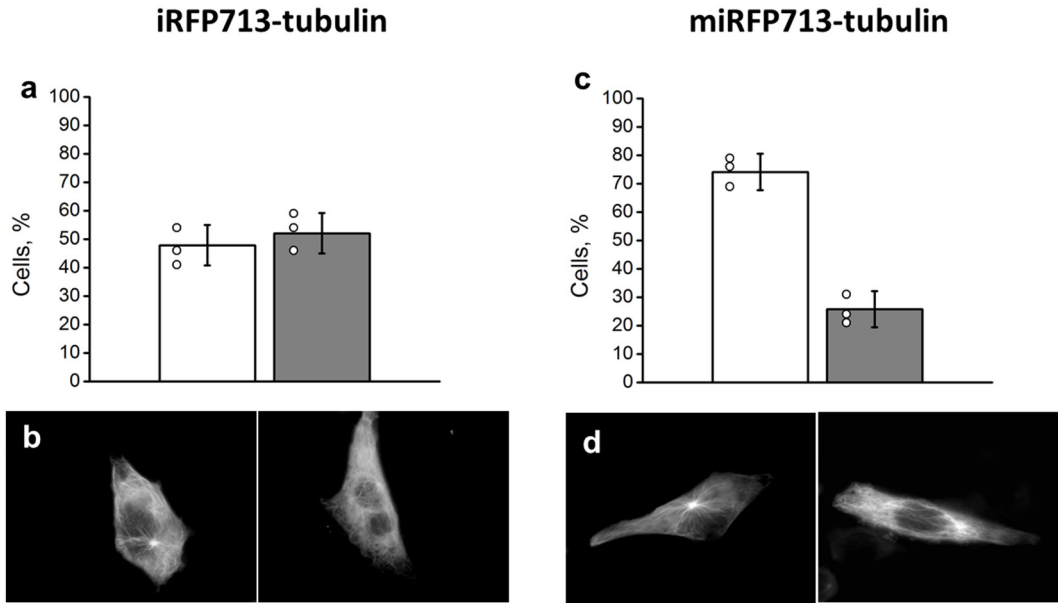

**Supplementary Figure 2. Comparison of localization efficiency for tubulin fusions of dimeric and monomeric iRFP713 variants.** (a, c) Percent of HeLa cells with proper localization (white column) or aberrant localization (grey column) of fluorescently labeled tubulin. (b, d) Widefield images showing representative cells with proper (left) or aberrant (right) localization of the construct. Error bars are double s.e.m, N=3 transfection experiments with at least 50 cells total for each fusion construct.

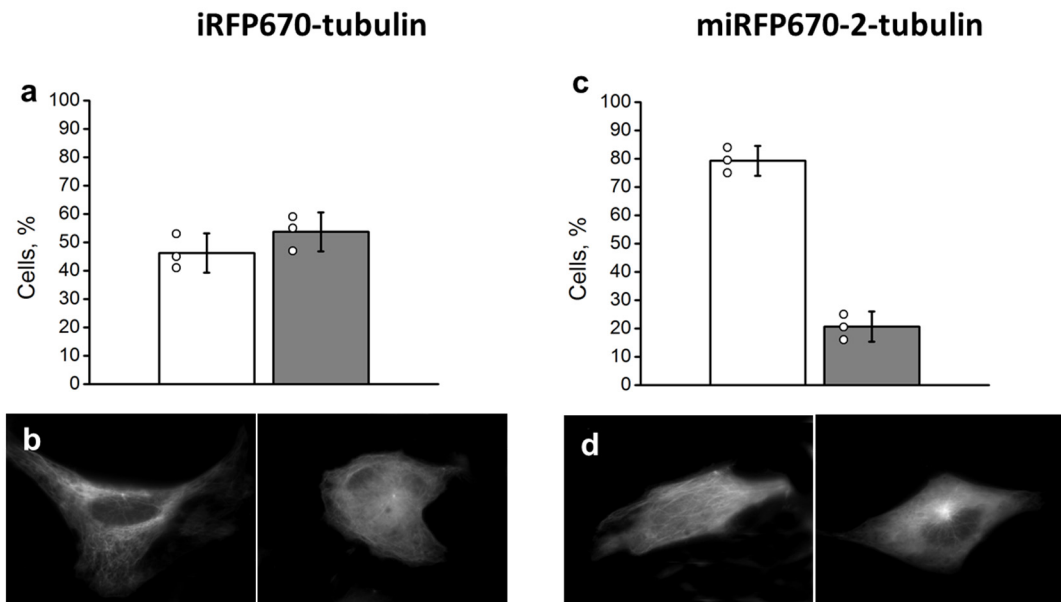

**Supplementary Figure 3. Comparison of localization efficiency for tubulin fusions of dimeric and monomeric iRFP670 variants.** (a, c) Percent of HeLa cells with proper localization (white column) or aberrant localization (grey column) of fluorescently labeled tubulin. (b, d) Widefield images showing representative cells with proper (left) or aberrant (right) localization of the construct. Error bars are double s.e.m, N=3 transfection experiments with at least 50 cells total for each fusion construct.

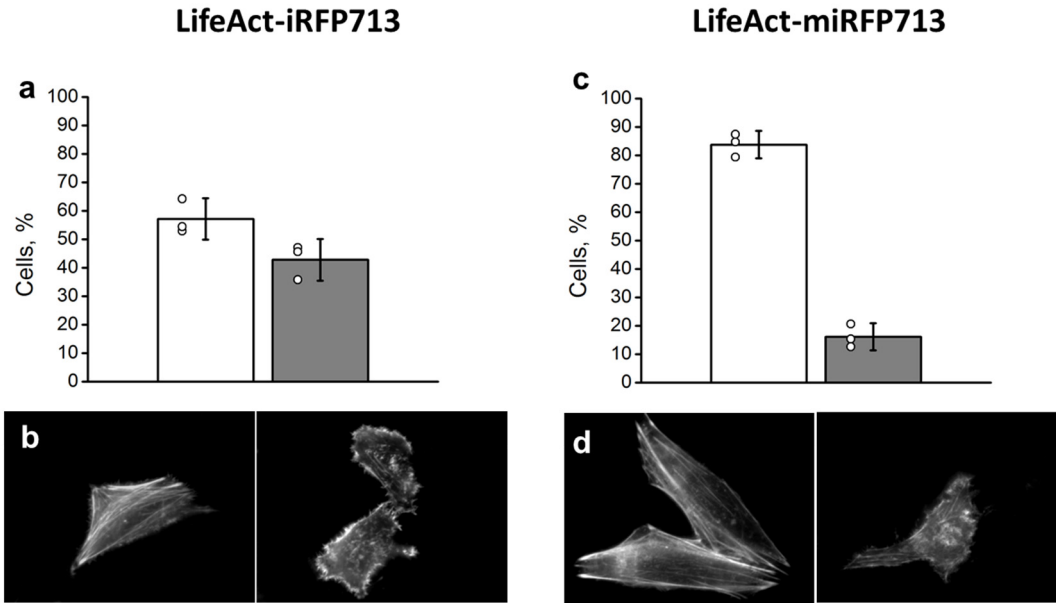

**Supplementary Figure 4. Comparison of localization efficiency for LifeAct fusions of dimeric and monomeric iRFP713 variants.** (a, c) Percent of HeLa cells with proper localization (white column) or aberrant localization (grey column) of fluorescently labeled tubulin. (b, d) Widefield images showing representative cells with proper (left) or aberrant (right) localization of the construct. Error bars are double s.e.m, N=3 transfection experiments with at least 50 cells total for each fusion construct.

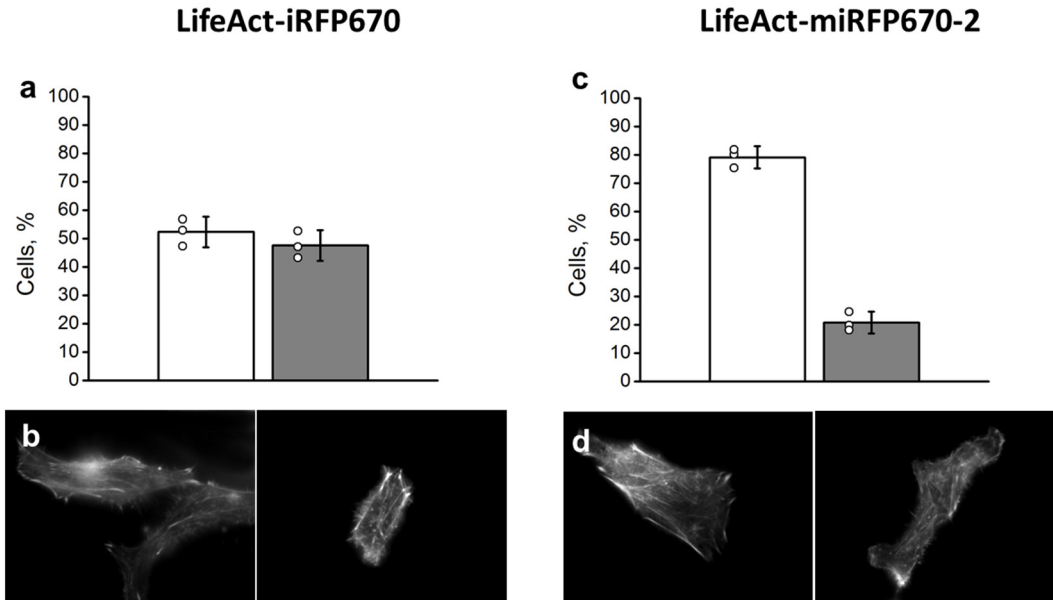

**Supplementary Figure 5. Comparison of localization efficiency for LifeAct fusions of dimeric and monomeric iRFP670 variants.** (a, c) Percent of HeLa cells with proper localization (white column) or aberrant localization (grey column) of fluorescently labeled tubulin. (b, d) Widefield images showing representative cells with proper (left) or aberrant (right) localization of the construct. Error bars are double s.e.m, N=3 transfection experiments with at least 50 cells total for each fusion construct.

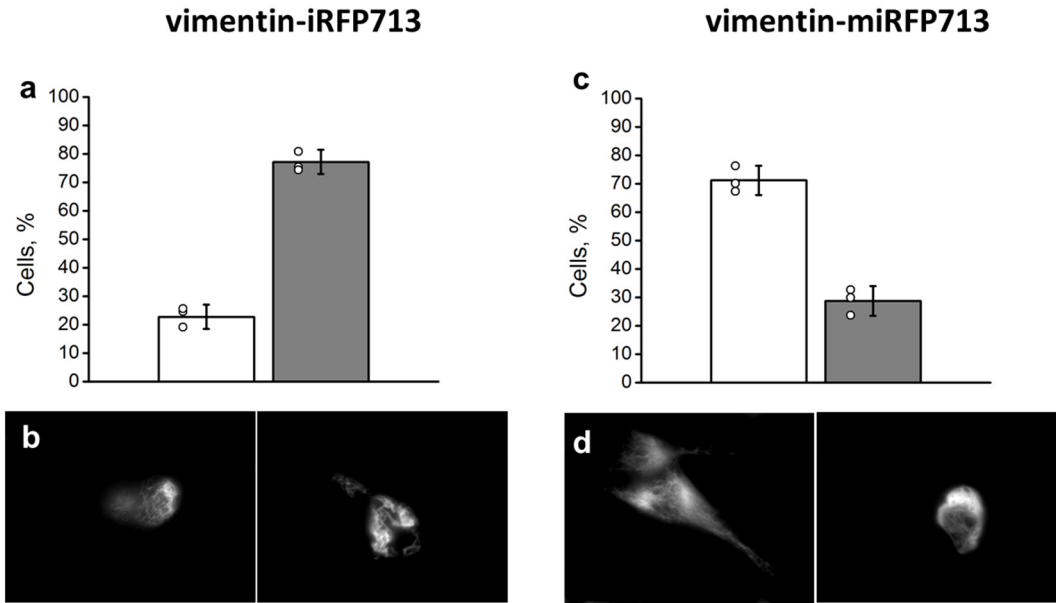

**Supplementary Figure 6. Comparison of localization efficiency for vimentin fusions of dimeric and monomeric iRFP713 variants.** (a, c) Percent of HeLa cells with proper localization (white column) or aberrant localization (grey column) of fluorescently labeled tubulin. (b, d) Widefield images showing representative cells with proper (left) or aberrant (right) localization of the construct. Error bars are double s.e.m, N=3 transfection experiments with at least 50 cells total for each fusion construct.

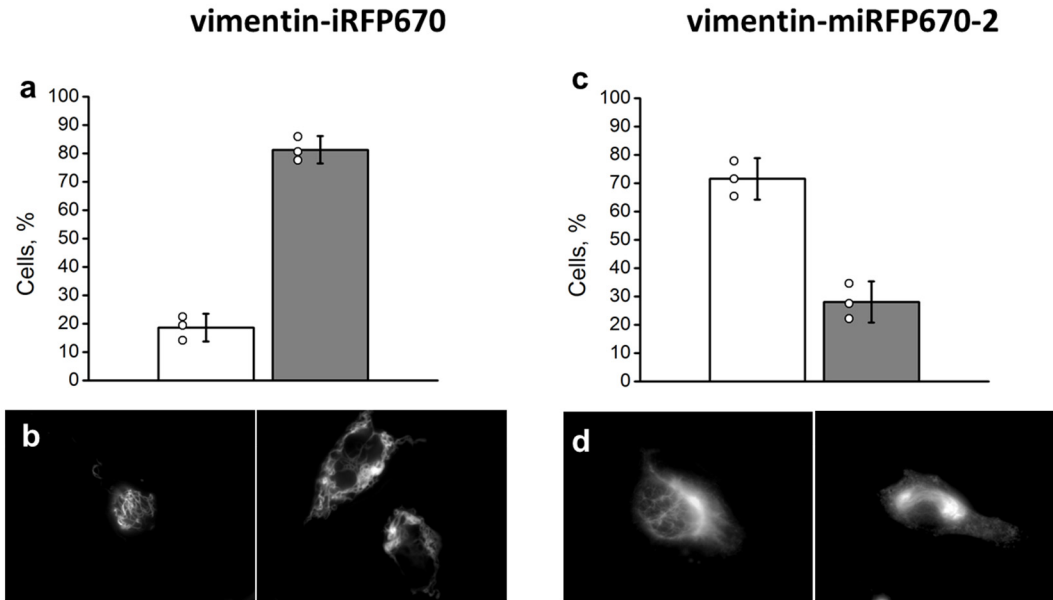

**Supplementary Figure 7. Comparison of localization efficiency for vimentin fusions of dimeric and monomeric iRFP670 variants.** (a, c) Percent of HeLa cells with proper localization (white column) or aberrant localization (grey column) of fluorescently labeled tubulin. (b, d) Widefield images showing representative cells with proper (left) or aberrant (right) localization of the construct. Error bars are double s.e.m, N=3 transfection experiments with at least 50 cells total for each fusion construct.

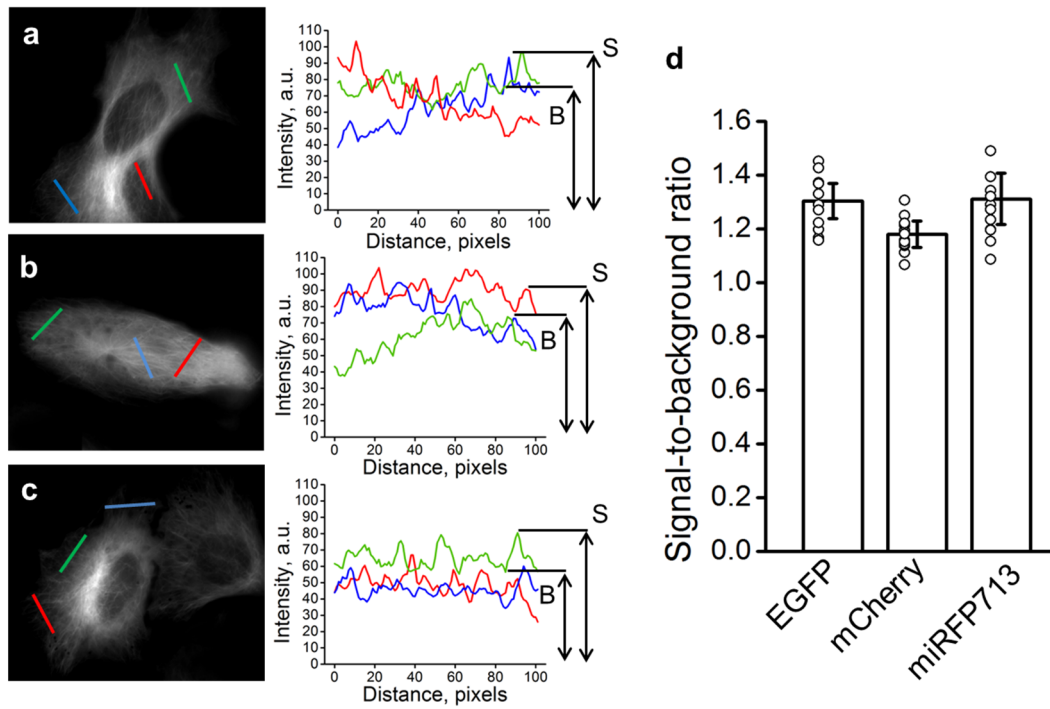

**Supplementary Figure 8. Signal-to-background ratio for tubulin fusions of EGFP, mCherry and miRFP713.** (a-c) Widefield images of HeLa cells expressing EGFP-tubulin (a), mCherry-tubulin (b) and miRFP713-tubulin (c). For each cell, 3 profiles were plotted across cell body. (d) Signal-to-background ratio was measured as a ratio of fluorescence intensity of microtubules to fluorescence intensity of surrounding cytoplasm (indicated in the profiles as S and B, respectively). Error bars are double s.e.m,  $N \geq 15$  cells for each fusion construct.

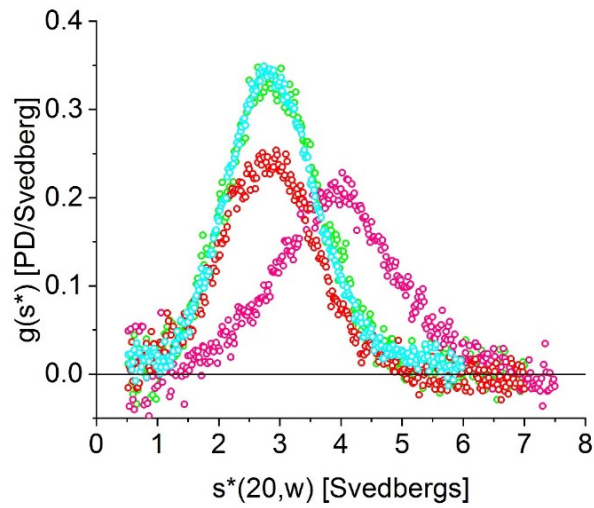

**Supplementary Figure 9. Sedimentation analysis of monomerized iRFP variants.**

Sedimentation velocity analytical ultracentrifugation of monomerized miRFP713 (representative RpBphP2-derived FP, in red), monomerized miRFP670-2 (representative RpBphP6-derived FP, in green), control monomeric RpBphP1-derived miRFP670 (in cyan) and dimeric RpBphP2-derived iRFP720 (in magenta) run in the same conditions. The proteins were analyzed at concentrations of 15  $\mu$ M in PBS buffer at 20°C, the time-derivative method was used. Overlay of the sedimentation coefficient distributions are shown. Monomeric NIR FPs showed peaks with the maxima centered at a sedimentation coefficient of  $\sim$ 2.8-2.85 S that corresponds to the monomer (MW=35 $\pm$ 3kDa). Control dimeric iRFP720 showed the peak at  $\sim$ 4.0 S that corresponds to the dimer.



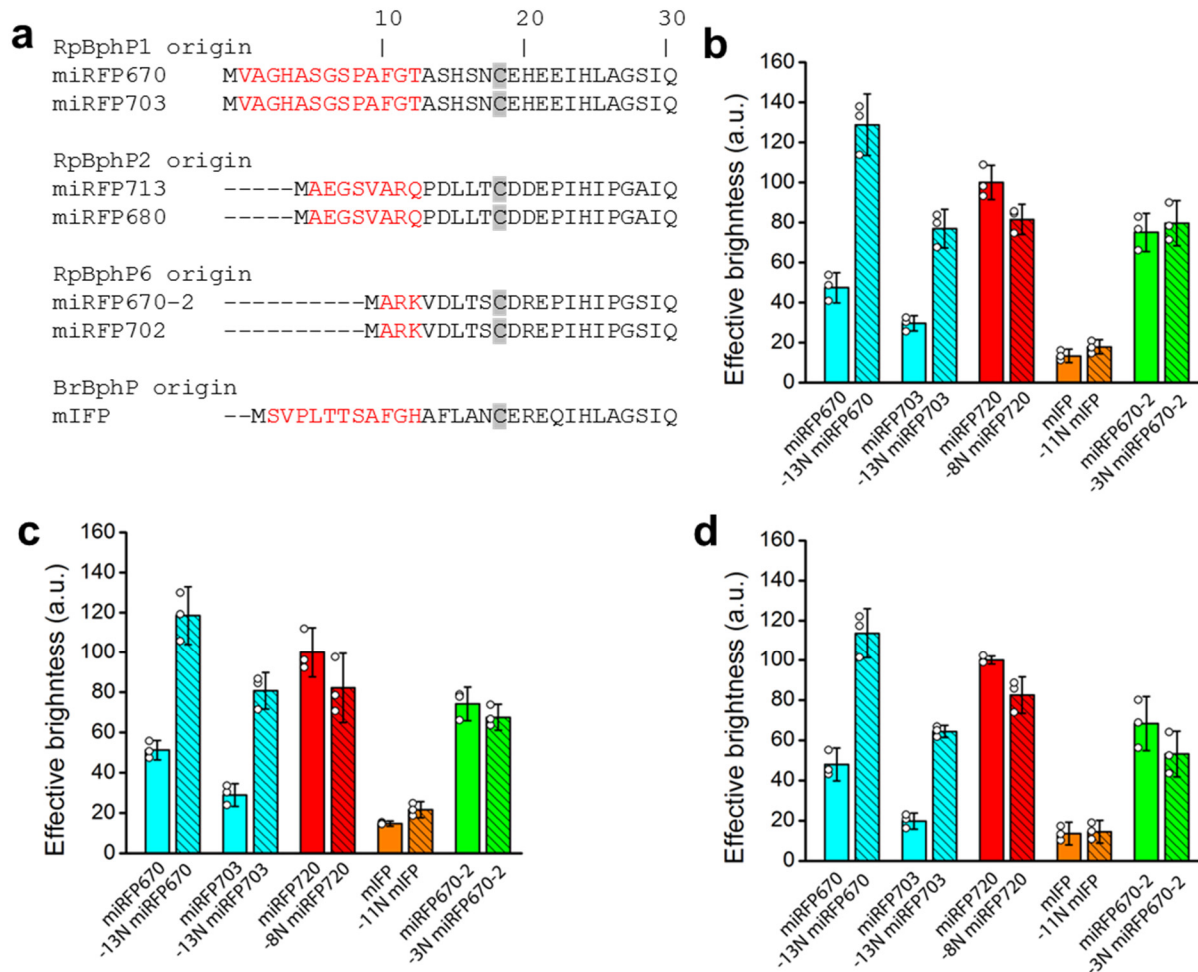

**Supplementary Figure 10. Effect of N-terminus truncation on brightness of NIR mFPs derived from different BphPs in mammalian cells. (a)** Alignment of N-termini of various BphP precursors of monomeric NIR FPs. **(b)** Effective brightness of miRFP variants with the original (plane) and shortened N-terminus (diagonal pattern) in live COS-1 cells 72 h after transfection. The effective brightness of miRFP720 is assumed to be 100%. **(c,d)** Same as in (a) but in live HeLa (c) and live NIH3T3 (d) cells. Error bars are double s.e.m, N=3 transfection experiments.

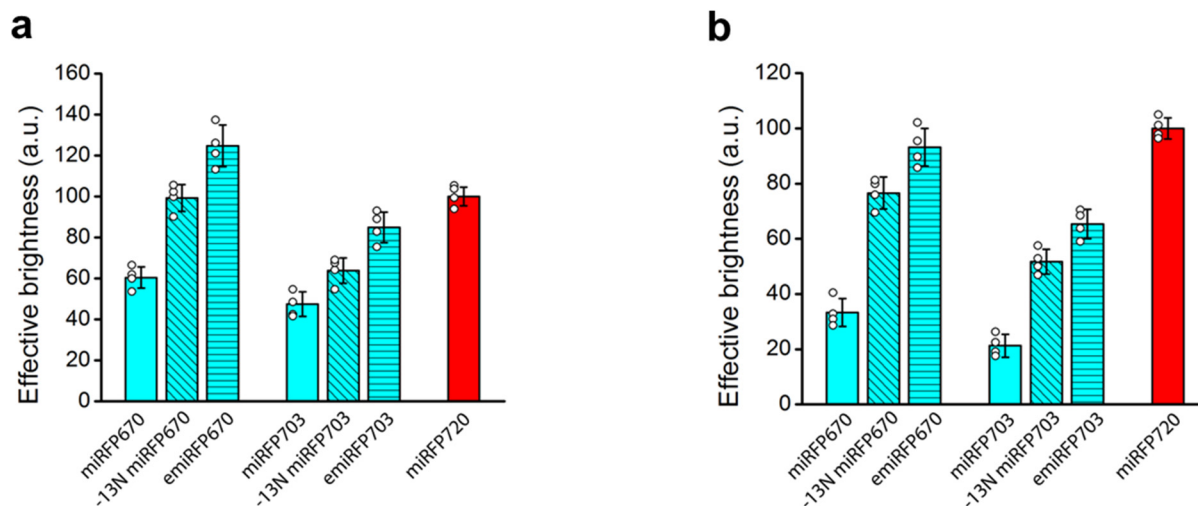

**Supplementary Figure 11. Effect of N-terminus on brightness of RpBphP1-derived NIR mFPs in mammalian cells.** (a,b) Effective brightness of miRFP670 and miRFP703, their variants with 13 amino acid residues removed from N-terminus, and their variants with N-termini from RpBphP2. Measurements were performed 72 h after transfection in live HeLa cells (a) and live NIH3T3 cells (b). Effective brightness of miRFP720 was assumed to be 100%. Error bars are double s.e.m, N=3 transfection experiments.

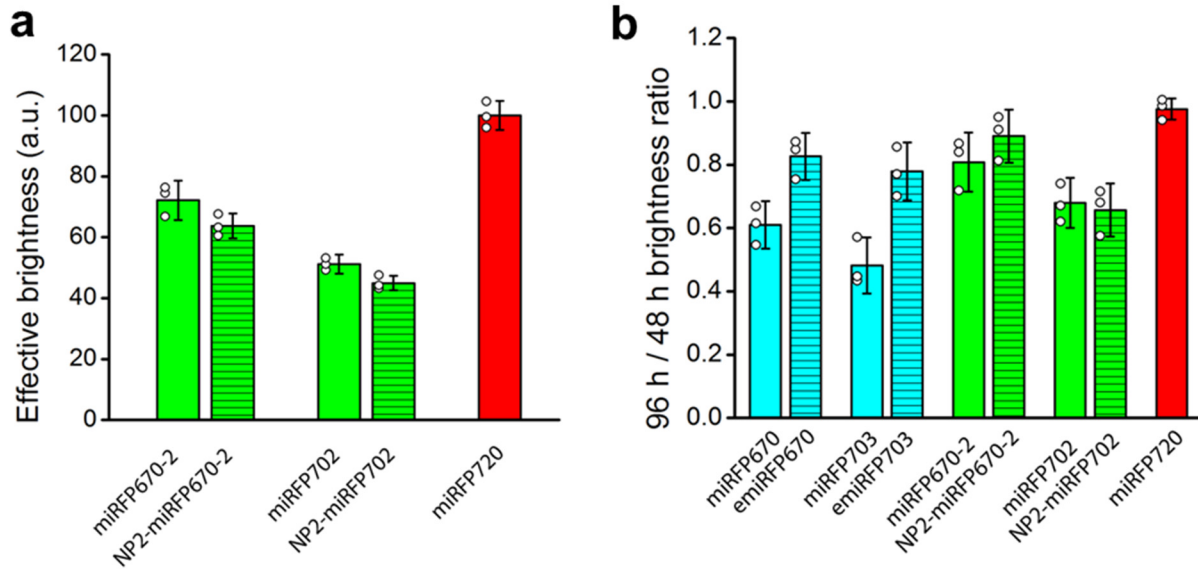

**Supplementary Figure 12. The effect of N-terminus in miRFPs on the effective brightness and protein stability.** (a) Effective brightness of miRFPs derived from RpBphP6 with truncated N-terminus and their variants with N-termini of RpBphP2. (b) Ratio of effective brightness of miRFPs and emiRFPs derived from RpBphP1 and miRFPs derived from RpBphP6 at 48 h and 96 h. Error bars, s.e.m. (n=3; transfection experiments). Error bars are double s.e.m, N=3 transfection experiments.

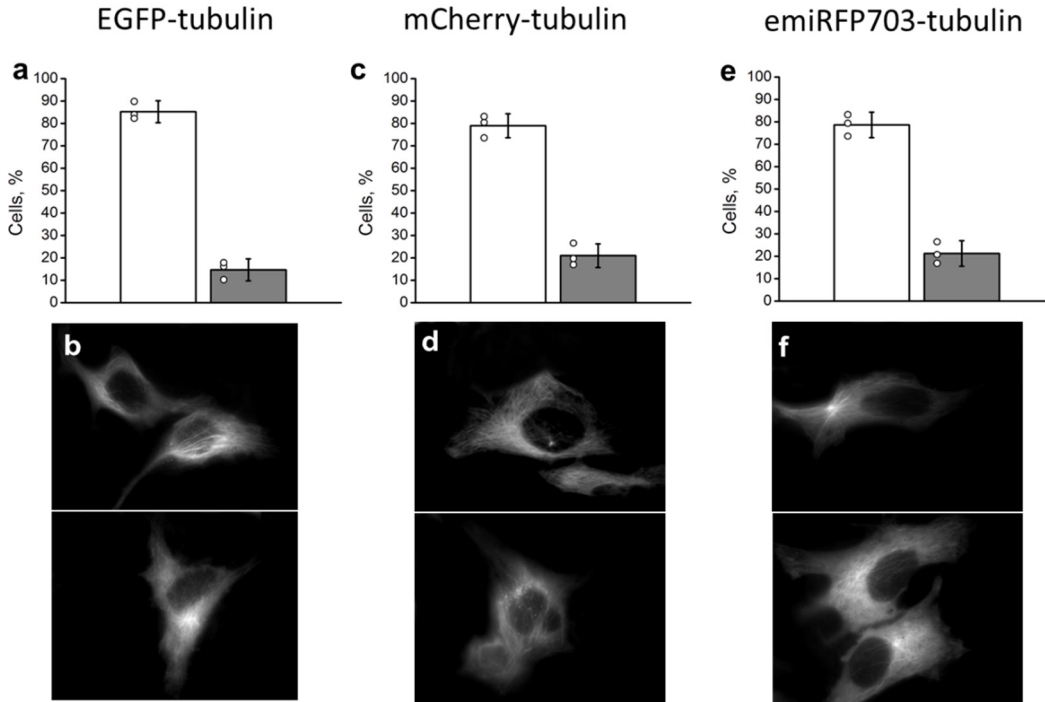

**Supplementary Figure 13. Comparison of localization efficiency for tubulin fusions of EGFP, mCherry and emiRFP703.** (a, c, e) Percent of HeLa cells with proper localization (white column) or aberrant localization (grey column) of fluorescently labeled tubulin. (b, d, f) Widefield images showing representative cells with proper (top) or aberrant (bottom) localization of the construct. Error bars are double s.e.m, N=3 transfection experiments with at least 50 cells total for each fusion construct.

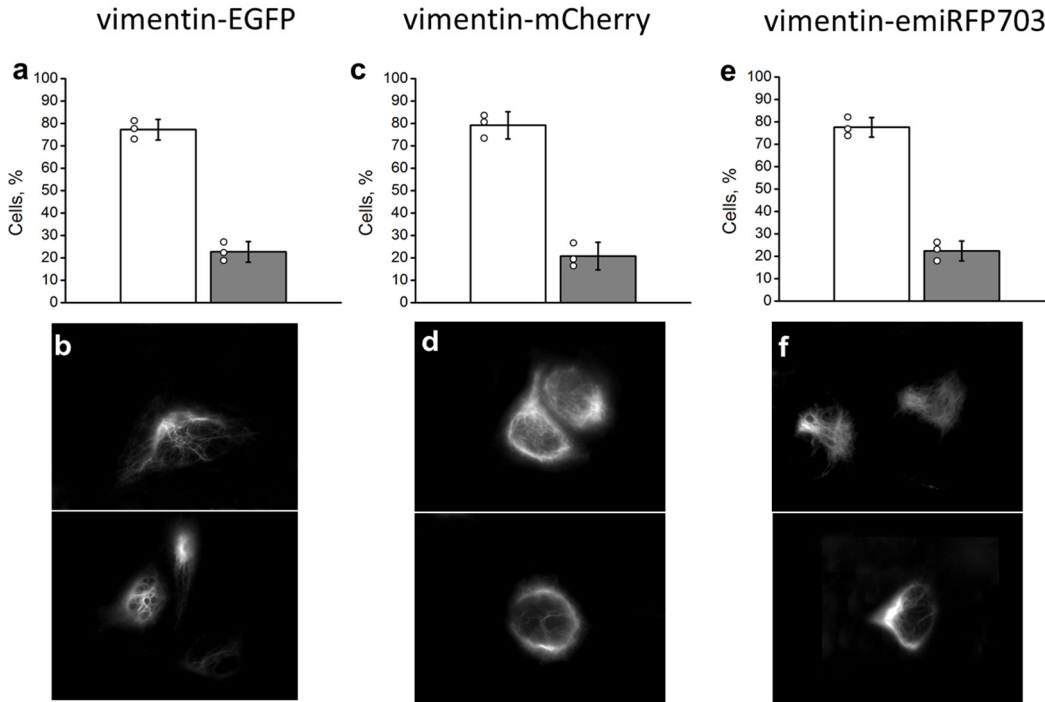

**Supplementary Figure 14. Comparison of localization efficiency for vimentin fusions of EGFP, mCherry and emiRFP703.** (a, c, e) Percent of HeLa cells with proper localization (white column) or aberrant localization (grey column) of fluorescently labeled tubulin. (b, d, f) Widefield images showing representative cells with proper (top) or aberrant (bottom) localization of the construct. Error bars are double s.e.m, N=3 transfection experiments with at least 50 cells total for each fusion construct.

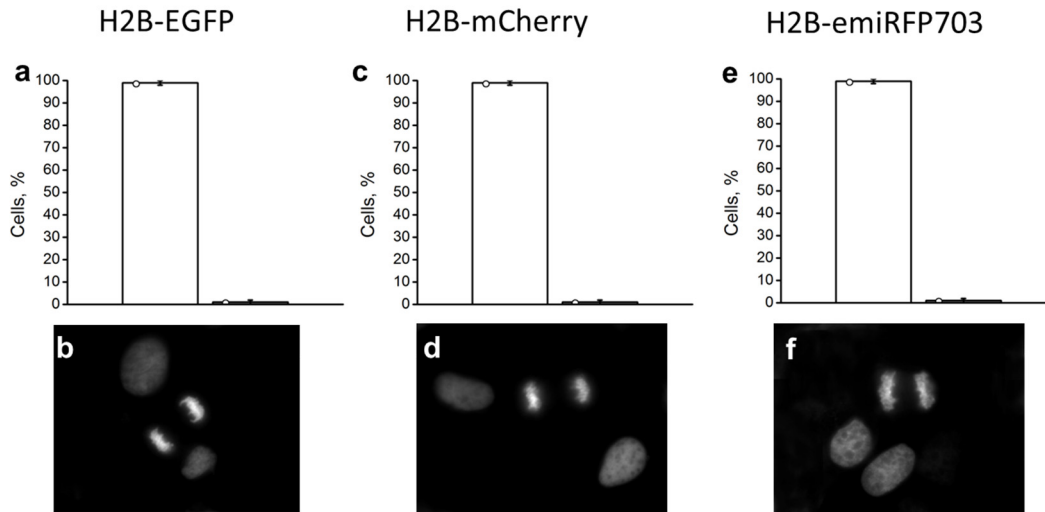

**Supplementary Figure 15. Comparison of localization efficiency for H2B fusions of EGFP, mCherry and emiRFP703.** (a, c, e) Percent of HeLa cells with proper localization (white column) or aberrant localization (grey column) of fluorescently labeled tubulin. (b, d, f) Widefield images showing representative cells expressing H2B-EGFP (b), H2B-mCherry (d) and H2B-emiRFP703 (f) constructs. Error bars are double s.e.m, N=3 transfection experiments with at least 50 cells total for each fusion construct.

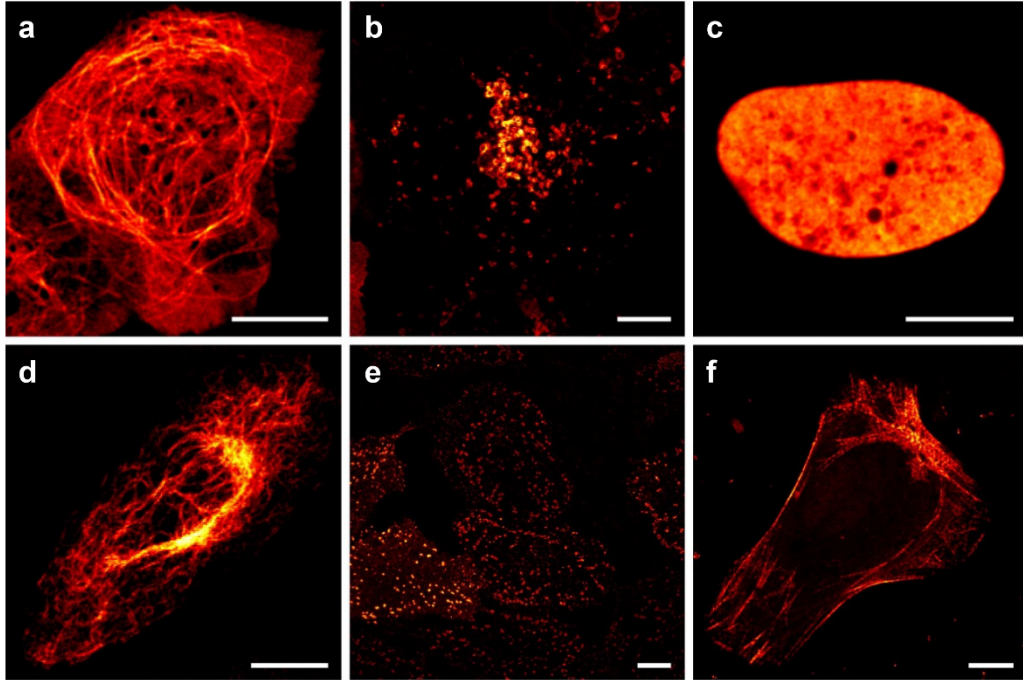

**Supplementary Figure 16. Confocal imaging of HeLa and U2OS cells expressing emiRFP-variants.** Confocal images of cells expressing (a) emiRFP703-tubulin, (b) LAMP1-emiRFP670, (c) H2B-emiRFP670, (d) vimentin-emiRFP703, (e) emiRFP703-clathrin, and (f) emiRFP703-myosin. The cells were transfected for 24-72 h. Scale bars, 10  $\mu\text{m}$ .

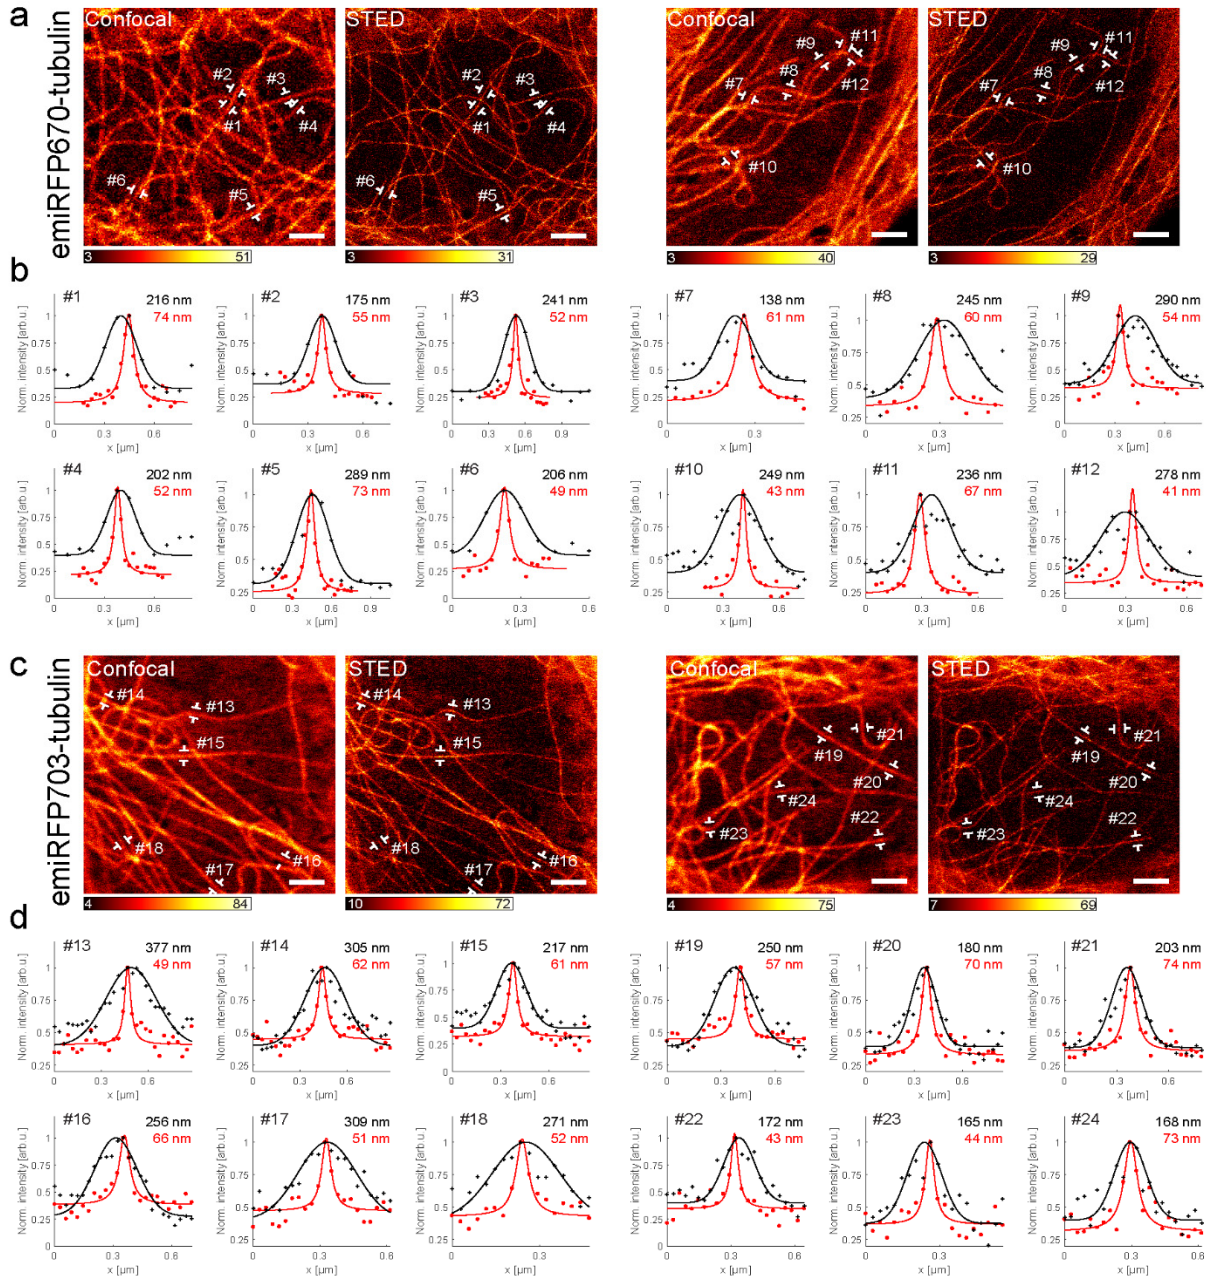

**Supplementary Figure 17. STED imaging of HeLa cells with emiRFP670-tubulin and emiRFP703-tubulin.** (a) Confocal and STED images of HeLa cells transfected with emiRFP670-tubulin. (b) #1-#12 shows line profiles and corresponding fits from the marked lines in the images in panel a. The fits are Gaussian fits to the confocal data (black solid lines) and Lorentzian fits to the STED data (red solid lines). (c) Confocal and STED images of HeLa cells transfected with emiRFP703-tubulin. (d) #13-#24 shows line profiles and corresponding fits from the marked lines in the images in a. The fits are Gaussian fits to the confocal data (black solid lines) and Lorentzian fits to the STED data (red solid lines). Line profiles are averaged over a width of 3 pixels. Scale bars, 2  $\mu$ m.



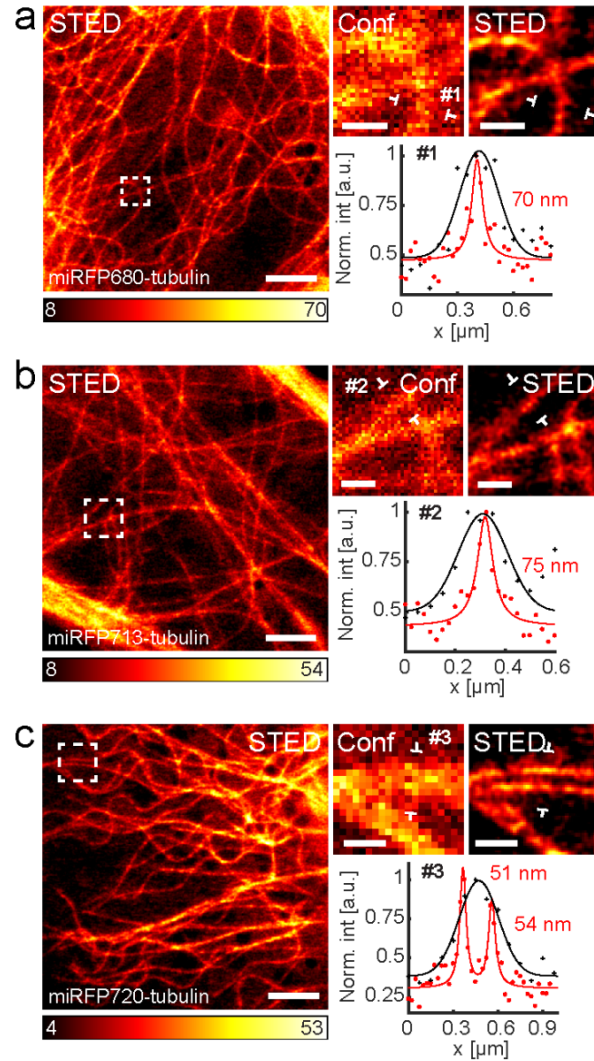

**Supplementary Figure 18. STED imaging of U2OS cells expressing tubulin fused to miRFP680, miRFP713 and miRFP720.** (a) Confocal and STED images of a U2OS cell expressing miRFP680-tubulin. #1 shows a line profile from the zoom-in of the region of interest, with a Gaussian fit for the confocal data (black solid line) and a Lorentzian fit for the STED data (red solid line). (b) Confocal and STED images of a U2OS cell expressing miRFP713-tubulin. #2 shows a line profile from the zoom-in of the region of interest, with a Gaussian fit for the confocal data (black solid line) and a Lorentzian fit for the STED data (red solid line). (c) Confocal and STED images of a U2OS cell expressing miRFP720-tubulin. #3 shows a line profile from the zoom-in of the region of interest, showing two tubules in close proximity, only resolvable in the STED image. The line profile is fitted with a Gaussian function for the confocal data (black solid line) and a double Lorentzian function for the STED data (red solid line).

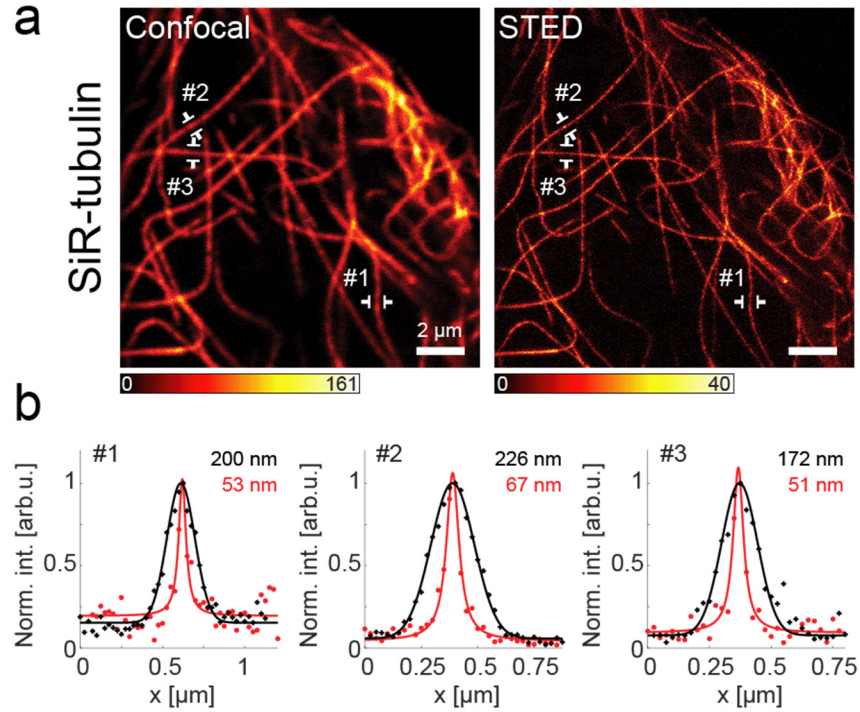

**Supplementary Figure 19. STED imaging of U2OS cells with SiR-tubulin.** (a) Confocal and STED image of U2OS cells with SiR-tubulin. (b) #1-#3 shows line profiles and corresponding fits from the marked lines in the images in panel a. The fits are Gaussian fits to the confocal data (black solid lines) and Lorentzian fits to the STED data (red solid lines). Line profiles are averaged over a width of 3 pixels. Scale bars, 2  $\mu\text{m}$ .

### **Supplementary Note 1. Comparison of the developed NIR FPs with SiR dye.**

To evaluate the competitiveness of the new engineered set of enhanced miRFPs with established far-red fluorescent proteins, such as SNIFP and mGarnet2, and tubulin-labeling dyes, such as SiR-tubulin, we compare the photostability, STED illumination dose, signal-to-noise (SNR) and signal-to-background (SBR) ratios of these FPs and dyes (Supplementary Tables 1 and 2).

Comparing the photostability of the probes in terms of possible recorded frames, for optimized STED imaging, the emiRFP703 performs well in the comparison with the previously published far-red FPs (Supplementary Table 2). In our photostability measurements (Fig. 5) we get 33 STED frames before the integrated fluorescence signal drops to  $1/e$  of the initial value. We see that the emiRFP703 can deliver three times as many frames as compared with measurements with the comparable FPs expressed together with vimentin, namely SNIFP and mGarnet2. Additionally, the STED illumination dose on the sample is at least 11x and up to 36x lower for emiRFP703 as compared to the other far-red FPs, something that is always important to consider in live-cell measurements. This low value is thanks to the engineered properties of the new emiRFP proteins, whose emission spectra more efficiently overlaps with the STED wavelength of 775 nm, without causing additional direct STED beam excitation or re-excitation.

When it comes to the SNR the emiRFP703 and emiRFP670 variants expressed with tubulin, as an example of the emiRFP-family, compares well when compared to imaging with the well-established SiR-tubulin dye (Supplementary Fig. 18 and Supplementary Table 1). The images from which the SNR- and SBR-values are calculated are optimized for image quality in terms of for example resolution, and we get the same resolution with the emiRFPs (Fig. 4, Supplementary Fig. 17) as with SiR-tubulin (Supplementary Fig. 19). Moreover, the total STED illumination dose used in the example of emiRFP703 is two-times lower than that used when imaging SiR-tubulin. We see that the SBR is lower for emiRFP670-tubulin and emiRFP703-tubulin than for SiR-tubulin. This owes to the fact that the emiRFPs are expressed with all  $\alpha$ -tubulin, inevitably also the cytosolic portion, while SiR-tubulin on the other hand only labels the polymerized  $\alpha$ -tubulin in the microtubules by using the drug Docetaxel<sup>5,6</sup>. This creates an almost background-free image in the case of SiR-tubulin, while the emiRFP703-tubulin image will have a cytosolic background ever present. Indeed, looking at emiRFP703 expressed with a protein that does not show noteworthy cytosolic background levels such as vimentin (Fig. 4d) we get a similar SNR-value and indeed also SBR-value as for SiR-tubulin, with as much as a 16x lower STED illumination dose.

## Supplementary References

1. Kamper, M., Ta, H., Jensen, N.A., Hell, S.W. & Jakobs, S. Near-infrared STED nanoscopy with an engineered bacterial phytochrome. *Nat Commun* **9**, 4762 (2018).
2. Hense, A. et al. Monomeric Garnet, a far-red fluorescent protein for live-cell STED imaging. *Sci Rep* **5**, 18006 (2015).
3. Matela, G. et al. A far-red emitting fluorescent marker protein, mGarnet2, for microscopy and STED nanoscopy. *Chem Commun (Camb)* **53**, 979-982 (2017).
4. Wegner, W. et al. In vivo mouse and live cell STED microscopy of neuronal actin plasticity using far-red emitting fluorescent proteins. *Sci Rep* **7**, 11781 (2017).
5. Lukinavicius, G. et al. Fluorogenic probes for live-cell imaging of the cytoskeleton. *Nat Methods* **11**, 731-733 (2014).
6. Lukinavicius, G. et al. Fluorescent dyes and probes for super-resolution microscopy of microtubules and tracheoles in living cells and tissues. *Chem Sci* **9**, 3324-3334 (2018).
